# Supplementary material
Source: PubMed Central journal article supplement (PMC124382)
Supplement: pnas_99_13_8820__2.pdf [file pnas_99_13_8820__2.pdf]

| Source                            | AA nos.   | -1123456789                                                                                                   |
|-----------------------------------|-----------|---------------------------------------------------------------------------------------------------------------|
| CLP 36                            | 138-153   | ITN <b>Q</b> YNS <b>P</b> T <b>G</b> LYSSKN                                                                   |
| Evi protein                       | 196-212   | GSN <b>L</b> L <b>L</b> Q <b>S</b> P <b>G</b> V <b>L</b> T <b>A</b> ARE                                       |
| CD22                              | 25-39     | D <b>W</b> T <b>V</b> D <b>H</b> P <b>Q</b> T <b>L</b> F <b>A</b> W <b>E</b> G                                |
| Apolipoprotein B                  | 767-782   | P <b>E</b> T <b>Y</b> S <b>G</b> S <b>V</b> A <b>N</b> E <b>A</b> N <b>T</b> Y                                |
| Actin-like protein                | 254-269   | V <b>G</b> G <b>E</b> R <b>F</b> E <b>A</b> P <b>E</b> A <b>L</b> F <b>Q</b> P <b>H</b>                       |
| Alcohol dehydrogenase             | 24-38     | I <b>E</b> E <b>I</b> E <b>V</b> A <b>P</b> P <b>K</b> A <b>H</b> E <b>V</b> R                                |
| α-2 Macroglobulin receptor        | 734-748   | R <b>K</b> I <b>V</b> Y <b>E</b> G <b>P</b> E <b>L</b> N <b>H</b> A <b>F</b> G                                |
| Fcγ receptor                      | 231-245   | E <b>V</b> G <b>E</b> Y <b>R</b> Q <b>P</b> S <b>G</b> G <b>S</b> V <b>P</b> V                                |
| Eα chain                          | 52-68     | A <b>S</b> F <b>E</b> A <b>Q</b> G <b>A</b> L <b>A</b> N <b>I</b> A <b>V</b> D <b>K</b> A                     |
| Apolipoprotein B                  | 3247-3259 | K <b>I</b> P <b>G</b> Y <b>T</b> V <b>P</b> V <b>V</b> N <b>V</b> E <b>V</b> S <b>P</b> F                     |
| CTLA-4                            | 38-52     | I <b>Q</b> V <b>T</b> Q <b>P</b> S <b>V</b> V <b>L</b> A <b>S</b> S <b>H</b> G                                |
| γ-Actin                           | 349-364   | I <b>S</b> K <b>Q</b> E <b>Y</b> D <b>E</b> S <b>G</b> P <b>S</b> I <b>V</b> H                                |
| Notch 1                           | 2059-2072 | A <b>R</b> E <b>G</b> S <b>Y</b> E <b>T</b> A <b>K</b> V <b>L</b> L <b>D</b> H                                |
| GAPDH                             | 227-242   | T <b>G</b> M <b>A</b> F <b>R</b> V <b>P</b> T <b>P</b> N <b>V</b> S <b>V</b> D                                |
| IL4R α chain                      | 630-644   | G <b>Y</b> K <b>P</b> F <b>Q</b> N <b>P</b> V <b>P</b> N <b>Q</b> S <b>P</b> S                                |
| Ly9                               | 173-191   | E <b>D</b> T <b>H</b> L <b>N</b> T <b>Y</b> D <b>G</b> S <b>H</b> T <b>L</b> R <b>V</b> S <b>Q</b> S          |
| γ-Actin                           | 163-177   | V <b>P</b> I <b>Y</b> E <b>G</b> Y <b>A</b> L <b>P</b> H <b>A</b> I <b>L</b> R                                |
| DEC205                            | 562-579   | D <b>P</b> D <b>S</b> R <b>G</b> E <b>Y</b> S <b>W</b> A <b>V</b> A <b>Q</b> G <b>V</b> K <b>Q</b>            |
| pp65 macrophage protein           | 537-552   | S <b>I</b> A <b>S</b> F <b>K</b> D <b>P</b> K <b>I</b> S <b>T</b> S <b>L</b> P <b>V</b>                       |
| H-2M α                            | 140-155   | A <b>P</b> V <b>E</b> G <b>A</b> S <b>P</b> T <b>S</b> I <b>S</b> A <b>V</b> D <b>G</b>                       |
| F-actin capping protein           | 68-83     | G <b>D</b> S <b>Y</b> R <b>S</b> P <b>W</b> S <b>N</b> K <b>Y</b> D <b>P</b> P <b>L</b>                       |
| VEGF 2 receptor                   | 122-133   | D <b>Y</b> R <b>S</b> P <b>F</b> I <b>A</b> S <b>V</b> S <b>D</b>                                             |
| CD79A                             | 82-94     | T <b>T</b> G <b>Q</b> L <b>F</b> F <b>P</b> E <b>V</b> N <b>K</b> N                                           |
| Tubulin α chain                   | 102-115   | I <b>N</b> Y <b>Q</b> P <b>T</b> V <b>V</b> P <b>G</b> G <b>D</b> L                                           |
| Ig μ chain                        | 376-391   | E <b>K</b> Y <b>V</b> T <b>S</b> A <b>P</b> M <b>P</b> E <b>P</b> G <b>A</b> G                                |
| IA β chain                        | 76-88     | H <b>N</b> Y <b>E</b> G <b>P</b> E <b>T</b> H <b>T</b> S <b>L</b> R                                           |
| Rab 5A                            | 86-101    | A <b>P</b> M <b>Y</b> Y <b>R</b> G <b>A</b> Q <b>A</b> I <b>V</b> Y <b>D</b>                                  |
| Unknown peptide                   |           | E <b>A</b> Y <b>N</b> A <b>T</b> P <b>A</b> T <b>L</b> A <b>V</b> D                                           |
| EstAA106114                       |           | E <b>A</b> Q <b>A</b> F <b>S</b> I <b>L</b> G <b>L</b> E <b>A</b> M <b>R</b> I                                |
| CD72                              | 34-52     | D <b>G</b> E <b>L</b> T <b>Y</b> E <b>N</b> V <b>Q</b> V <b>S</b> P <b>V</b> P <b>G</b> P <b>P</b>            |
| IA β chain                        | 50-64     | R <b>P</b> D <b>A</b> E <b>Y</b> W <b>N</b> S <b>Q</b> P <b>E</b> I <b>L</b> E                                |
| EstW42132                         |           | I <b>Y</b> E <b>A</b> Y <b>R</b> Q <b>G</b> A <b>N</b> L <b>E</b> A <b>L</b> L                                |
| Apolipoprotein E                  | 298-311   | A <b>T</b> N <b>P</b> I <b>I</b> T <b>P</b> V <b>A</b> Q <b>E</b> N <b>Q</b>                                  |
| IL6R β chain                      | 390-405   | T <b>N</b> D <b>R</b> Y <b>V</b> A <b>S</b> L <b>A</b> A <b>R</b> N <b>K</b> V <b>G</b>                       |
| LDL receptor                      | 486-501   | R <b>N</b> T <b>Y</b> W <b>T</b> D <b>S</b> V <b>P</b> G <b>S</b> V <b>A</b>                                  |
| Notch 2                           | 2418-2436 | E <b>S</b> P <b>D</b> Q <b>W</b> S <b>S</b> S <b>S</b> P <b>H</b> S <b>A</b> S <b>D</b> W                     |
| MLV envelop GP70                  | 195-209   | G <b>R</b> K <b>A</b> S <b>W</b> D <b>A</b> P <b>K</b> V <b>W</b> G <b>L</b> R                                |
| Ig μ chain                        | 409-421   | S <b>G</b> E <b>T</b> Y <b>T</b> C <b>V</b> V <b>G</b> H <b>E</b> A                                           |
| EstW48077                         |           | D <b>L</b> R <b>A</b> Q <b>I</b> A <b>G</b> Y <b>L</b> Y <b>G</b> V <b>S</b> L <b>Q</b> I <b>T</b> L          |
| Transferrin receptor              | 683-699   | K <b>V</b> E <b>Y</b> H <b>F</b> L <b>S</b> P <b>Y</b> V <b>S</b> P <b>R</b> E <b>S</b> P                     |
| VEGF 2 receptor                   | 548-563   | G <b>P</b> E <b>I</b> T <b>V</b> Q <b>P</b> A <b>A</b> O <b>P</b> T <b>E</b> Q <b>E</b>                       |
| Invariant chain                   | 85-100    | K <b>P</b> V <b>S</b> Q <b>M</b> R <b>M</b> A <b>T</b> P <b>L</b> L <b>M</b> R <b>P</b>                       |
| Mouse β2microglobulin             | 48-58     | T <b>Q</b> F <b>H</b> P <b>P</b> H <b>I</b> E <b>I</b> Q                                                      |
| MUC-18                            | 337-353   | E <b>L</b> L <b>V</b> N <b>Y</b> V <b>S</b> D <b>V</b> R <b>V</b> S <b>P</b> A <b>A</b> P                     |
| CD98 heavy chain                  | 207-223   | G <b>Q</b> N <b>A</b> W <b>F</b> L <b>P</b> A <b>Q</b> A <b>D</b> I <b>V</b> A <b>T</b> K                     |
| BIP                               | 62-76     | I <b>T</b> P <b>S</b> Y <b>V</b> A <b>F</b> T <b>P</b> E <b>G</b> E <b>R</b> L                                |
| Fibrinogen like protein precursor | 260-274   | E <b>W</b> K <b>D</b> Y <b>K</b> A <b>G</b> F <b>G</b> N <b>L</b> E <b>R</b> E                                |
| Integrin β-1                      | 778-794   | G <b>E</b> N <b>P</b> I <b>Y</b> K <b>S</b> A <b>V</b> T <b>T</b> V <b>V</b> N <b>P</b> K                     |
| Aspartate aminotransferase        | 395-411   | T <b>K</b> N <b>L</b> D <b>Y</b> V <b>A</b> T <b>S</b> I <b>H</b> E <b>A</b> V <b>T</b> K                     |
| MAMA protein                      | 501-513   | T <b>S</b> S <b>Y</b> S <b>N</b> P <b>T</b> I <b>G</b> Y <b>E</b> N <b>R</b>                                  |
| VDAC                              | 155-169   | V <b>D</b> F <b>D</b> A <b>G</b> P <b>A</b> I <b>H</b> G <b>S</b> A <b>V</b>                                  |
| EstW66697                         |           | N <b>Q</b> I <b>W</b> N <b>V</b> G <b>L</b> L <b>D</b> D <b>D</b> I <b>P</b> S                                |
| Notch-1                           | 2492-2504 | S <b>P</b> D <b>Q</b> W <b>S</b> S <b>S</b> S <b>P</b> H <b>S</b> N                                           |
| EstW57523                         |           | N <b>F</b> G <b>T</b> V <b>L</b> T <b>S</b> L <b>F</b> I <b>C</b> K <b>G</b> Q                                |
| MLVenv                            | 17-35     | S <b>S</b> D <b>L</b> Y <b>N</b> W <b>K</b> N <b>N</b> N <b>P</b> S <b>F</b> S <b>E</b> D <b>P</b> G          |
| ESTW64560                         |           | A <b>V</b> L <b>F</b> I <b>Q</b> R <b>F</b> K <b>E</b> V <b>G</b> A <b>W</b> V-                               |
| Glucose-6-phospahte isomerase     | 82-96     | D <b>N</b> M <b>F</b> S <b>G</b> S <b>K</b> I <b>N</b> Y <b>T</b> E <b>D</b> R <b>A</b> V <b>L</b> H          |
| Microtubule assoc protein PB1     | 352-372   | P <b>D</b> L <b>G</b> V <b>V</b> F <b>L</b> N <b>V</b> P <b>E</b> N <b>L</b> K <b>N</b> P <b>E</b> P <b>N</b> |
| CD22                              | 426-442   | A <b>K</b> L <b>D</b> V <b>H</b> Y <b>A</b> P <b>K</b> A <b>V</b> T <b>T</b> V <b>I</b> Q                     |
| Cofactor D                        | 1030-1045 | F <b>G</b> G <b>T</b> L <b>L</b> Q <b>V</b> F <b>E</b> D <b>N</b> L <b>L</b> N <b>D</b>                       |
| Class II cytokine receptor 4      | 127-142   | L <b>H</b> R <b>F</b> S <b>A</b> P <b>Q</b> I <b>E</b> N <b>E</b> P <b>T</b>                                  |
| Casein kinase 1-α                 | 137-153   | I <b>K</b> P <b>D</b> N <b>F</b> L <b>M</b> G <b>I</b> G <b>R</b> H <b>C</b> N <b>K</b> L                     |
| Y-174 (human)                     | 309-326   | K <b>L</b> P <b>S</b> R <b>P</b> A <b>D</b> N <b>Y</b> D <b>N</b> F <b>V</b> L <b>P</b> E <b>L</b>            |
| α-Catenin                         | 722-737   | M <b>M</b> E <b>M</b> T <b>D</b> F <b>T</b> R <b>G</b> K <b>G</b> P <b>L</b> K <b>N</b>                       |

Description: The sequences of 64 independent peptides were assembled from Dongre, et al. (2001) *Eur J Immunol* **31**, 1485. These peptides had been isolated from IA<sup>b</sup> and sequenced. In cases where multiple versions of a peptide were found, we used the shortest sequence common to all versions. The peptides were aligned to optimally fill the peptide amino acids side chain pockets found in the IA<sup>b</sup> structure as described in the accompanying paper. Amino acids occupying the traditional p1, p4, p6 and p9 pockets are colored red and those in auxiliary binding positions are colored blue.
